# Supplementary material
Source: publisher site journal article supplement (https://cdn.jamanetwork.com/ama/content_public/journal/jama/0/jsc200001supp14_prod.pdf)
Supplement: Supplementary file 1 [file jsc200001supp14_prod.pdf]

## Supplementary Online Content

Greer DM, Shemie SD, Lewis A, et al. Determination of brain death/death by neurologic criteria: The World Brain Death Project. *JAMA*.  
doi:10.1001/jama.2020.11586

**Supplement 14.** Determination of Brain Death/Death by Neurologic Criteria Process Overview

This supplementary material has been provided by the authors to give readers additional information about their work.

## Appendix 14: Determination of Brain Death/Death by Neurologic Criteria (BD/DNC) Process Overview

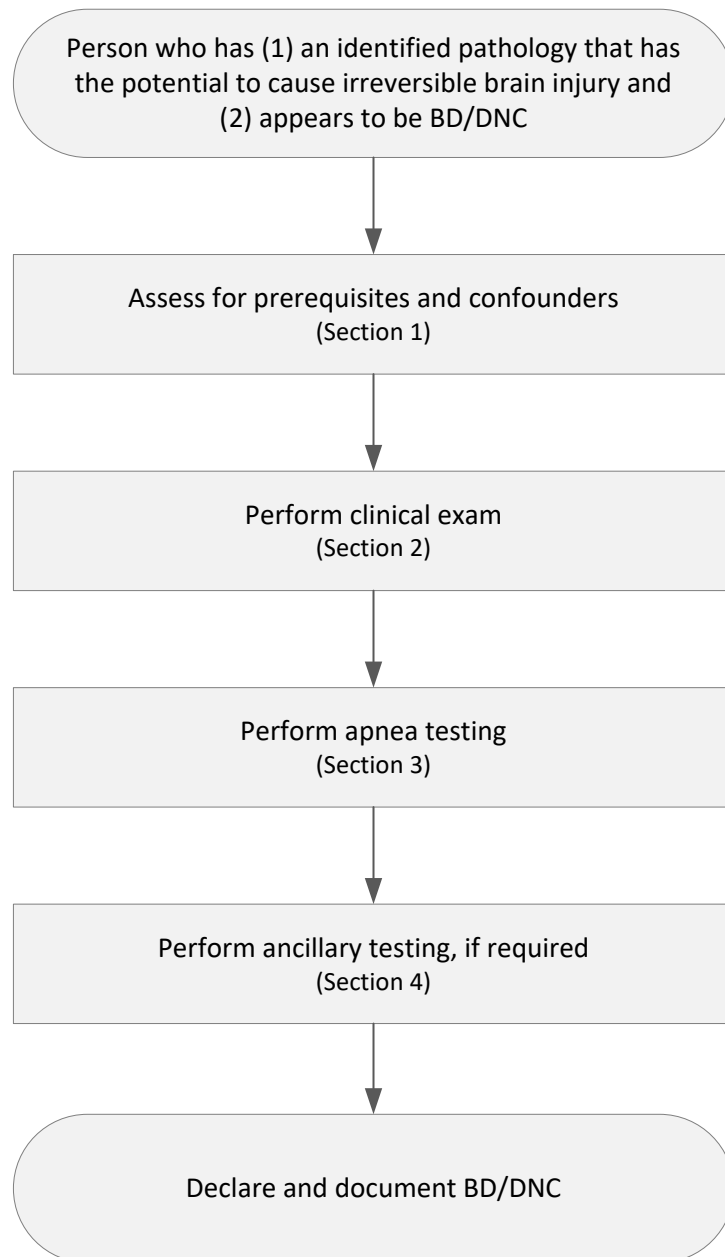

Based on recommendations developed by the World Brain Death Project (see main paper in *JAMA*)

To be used with the Determination of BD/DNC Checklist for Use in Adults and Children  $\geq$  36 Weeks of Age (see Supplement 15)

## Section 1.a. Assess for Prerequisites and Confounders\*

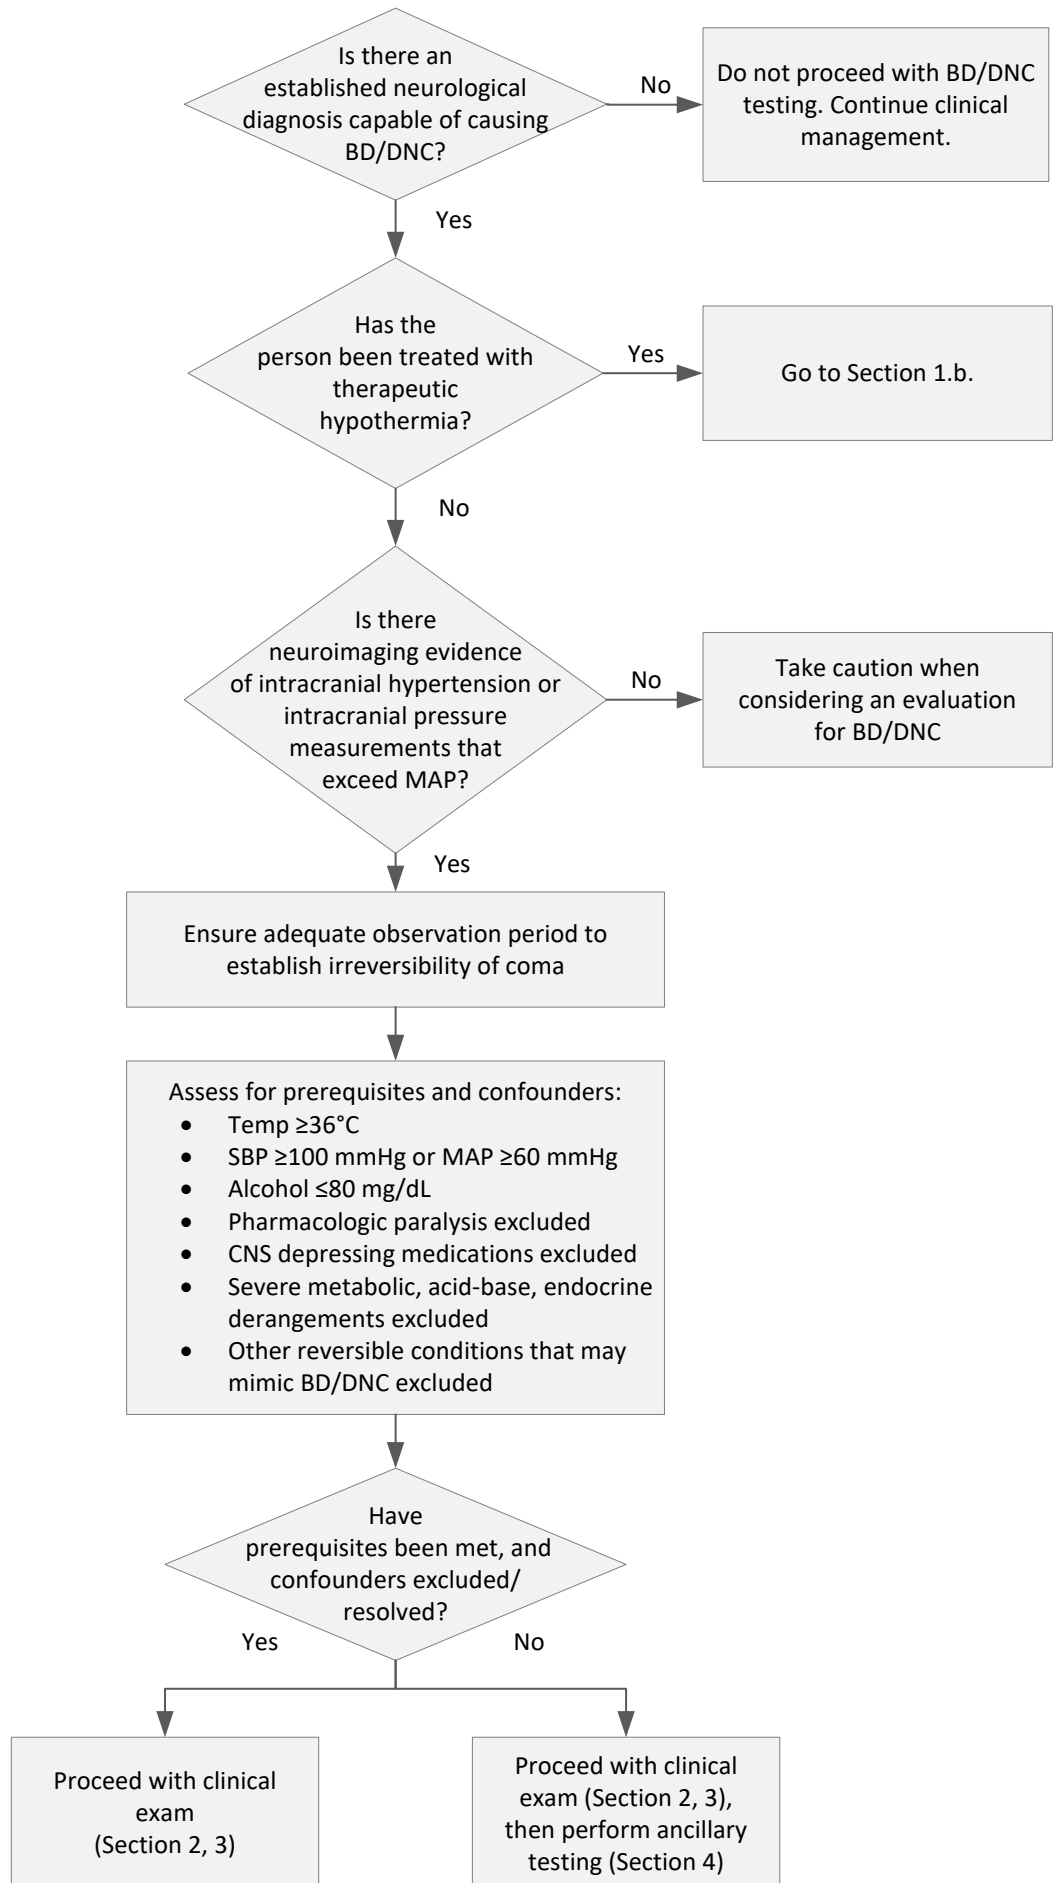

\*Refer to Supplement 15: Prerequisites for Clinical Examination, from the Checklist for Determination of Brain Death/Death by Neurologic Criteria

## Section 1.b. Assess for Prerequisites and Confounders in Persons Treated with Therapeutic Hypothermia\*

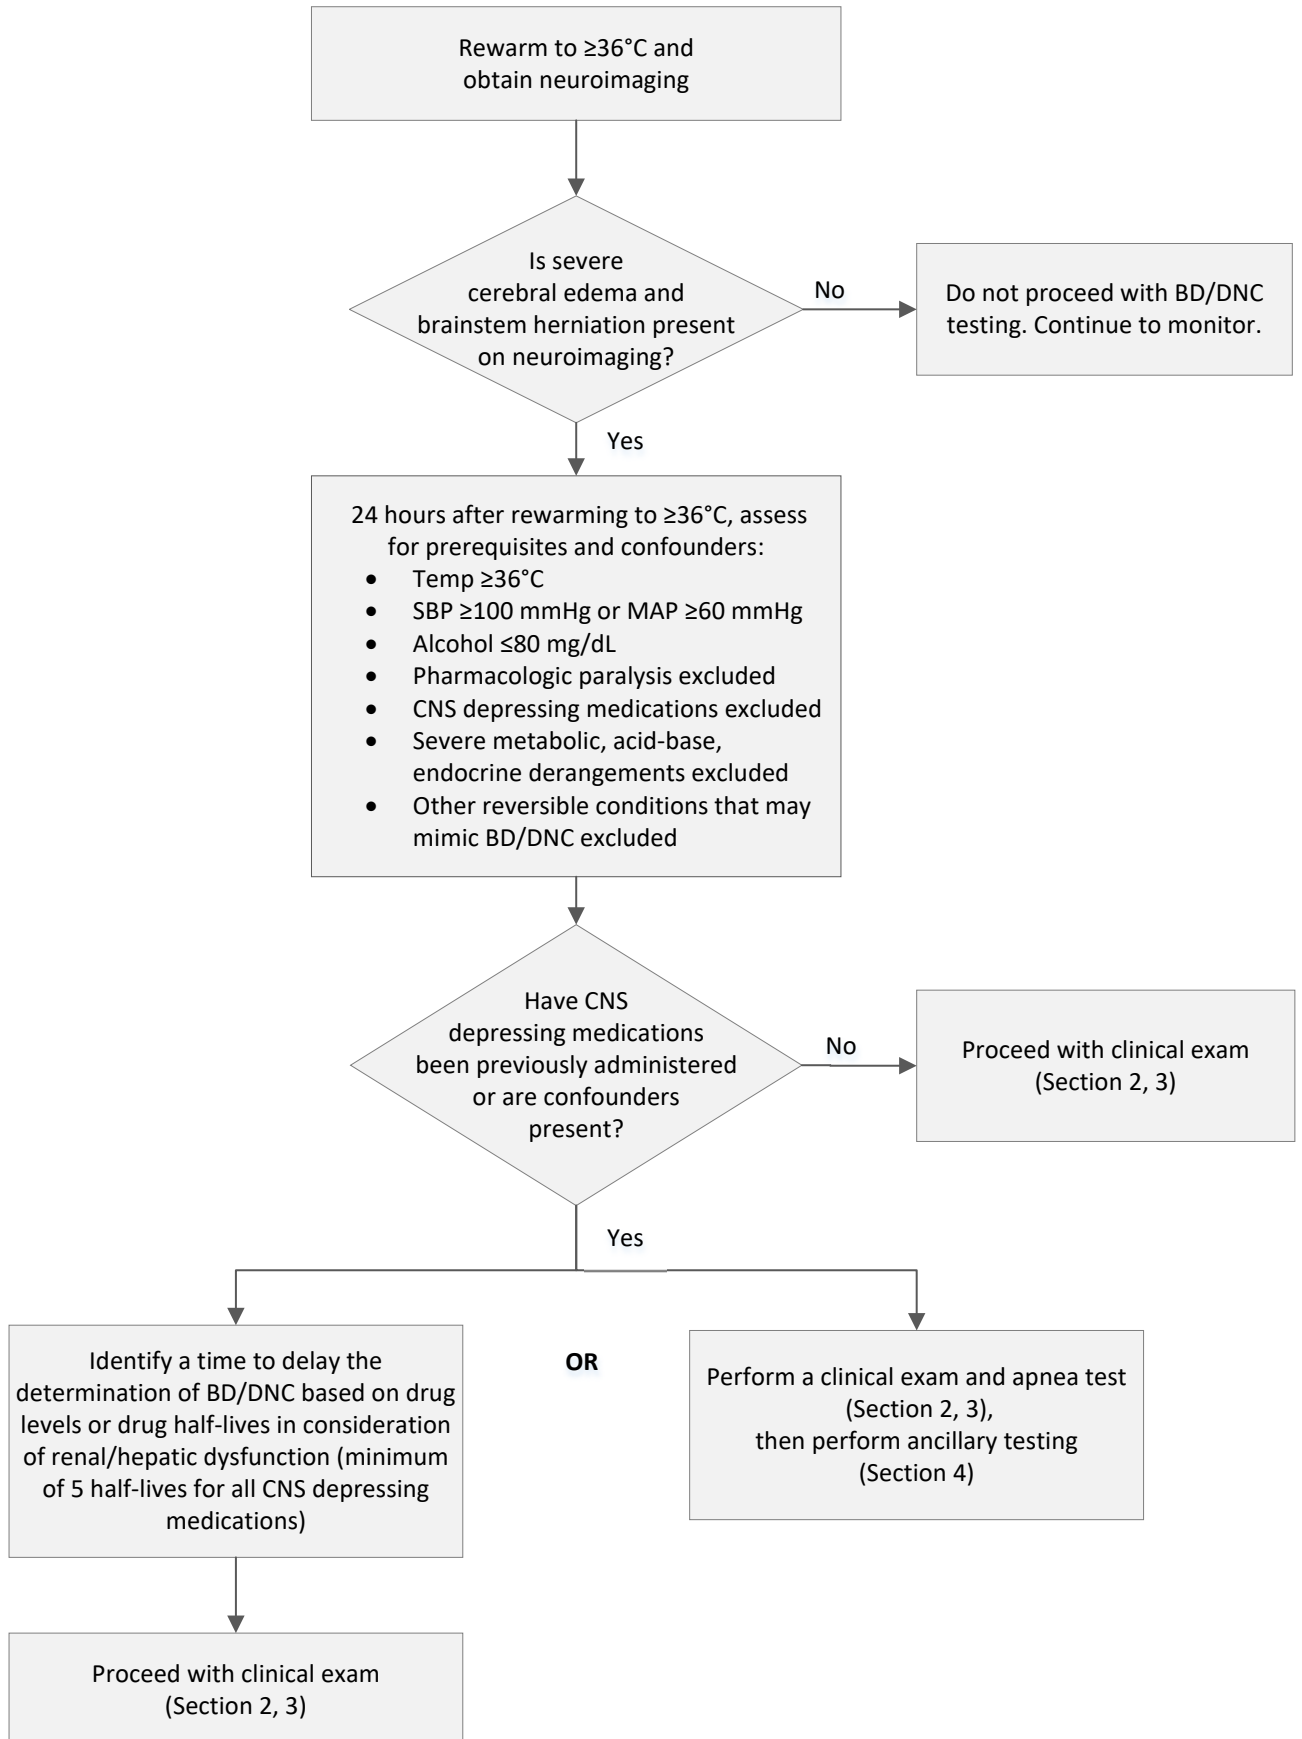

\*Refer to Supplement 15: Prerequisites for Clinical Examination, from the Checklist for Determination of Brain Death/Death by Neurologic Criteria

## Section 2. Perform Clinical Exam\*

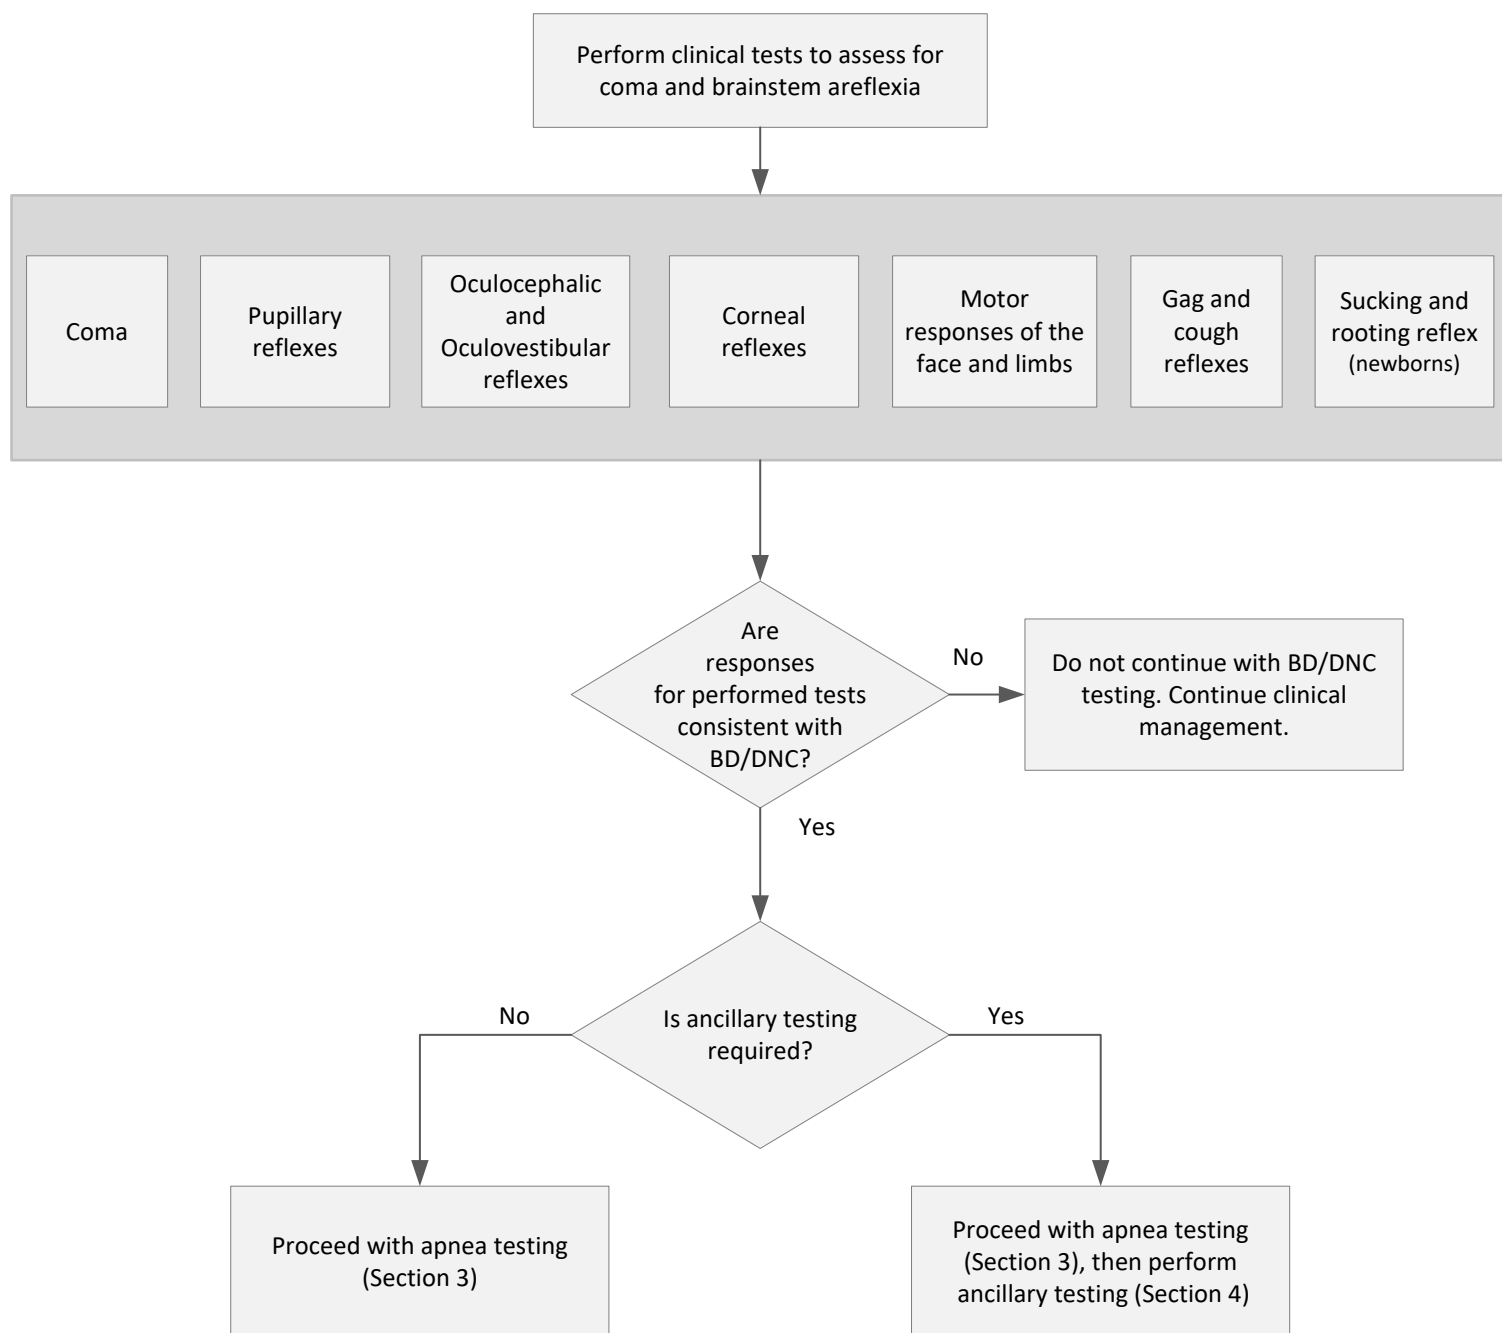

Ancillary testing is required when:

- There are confounding conditions that cannot be resolved,
- The clinical exam has been completed to the fullest extent possible and there is an inability to complete all tests,
- Uncertainty exists regarding interpretation of spinal-mediated motor responses,
- The whole brain death formulation is being followed, and there is isolated brainstem pathology,
- Dictated by law or regional guidelines.

### Section 3. Perform Apnea Testing\*

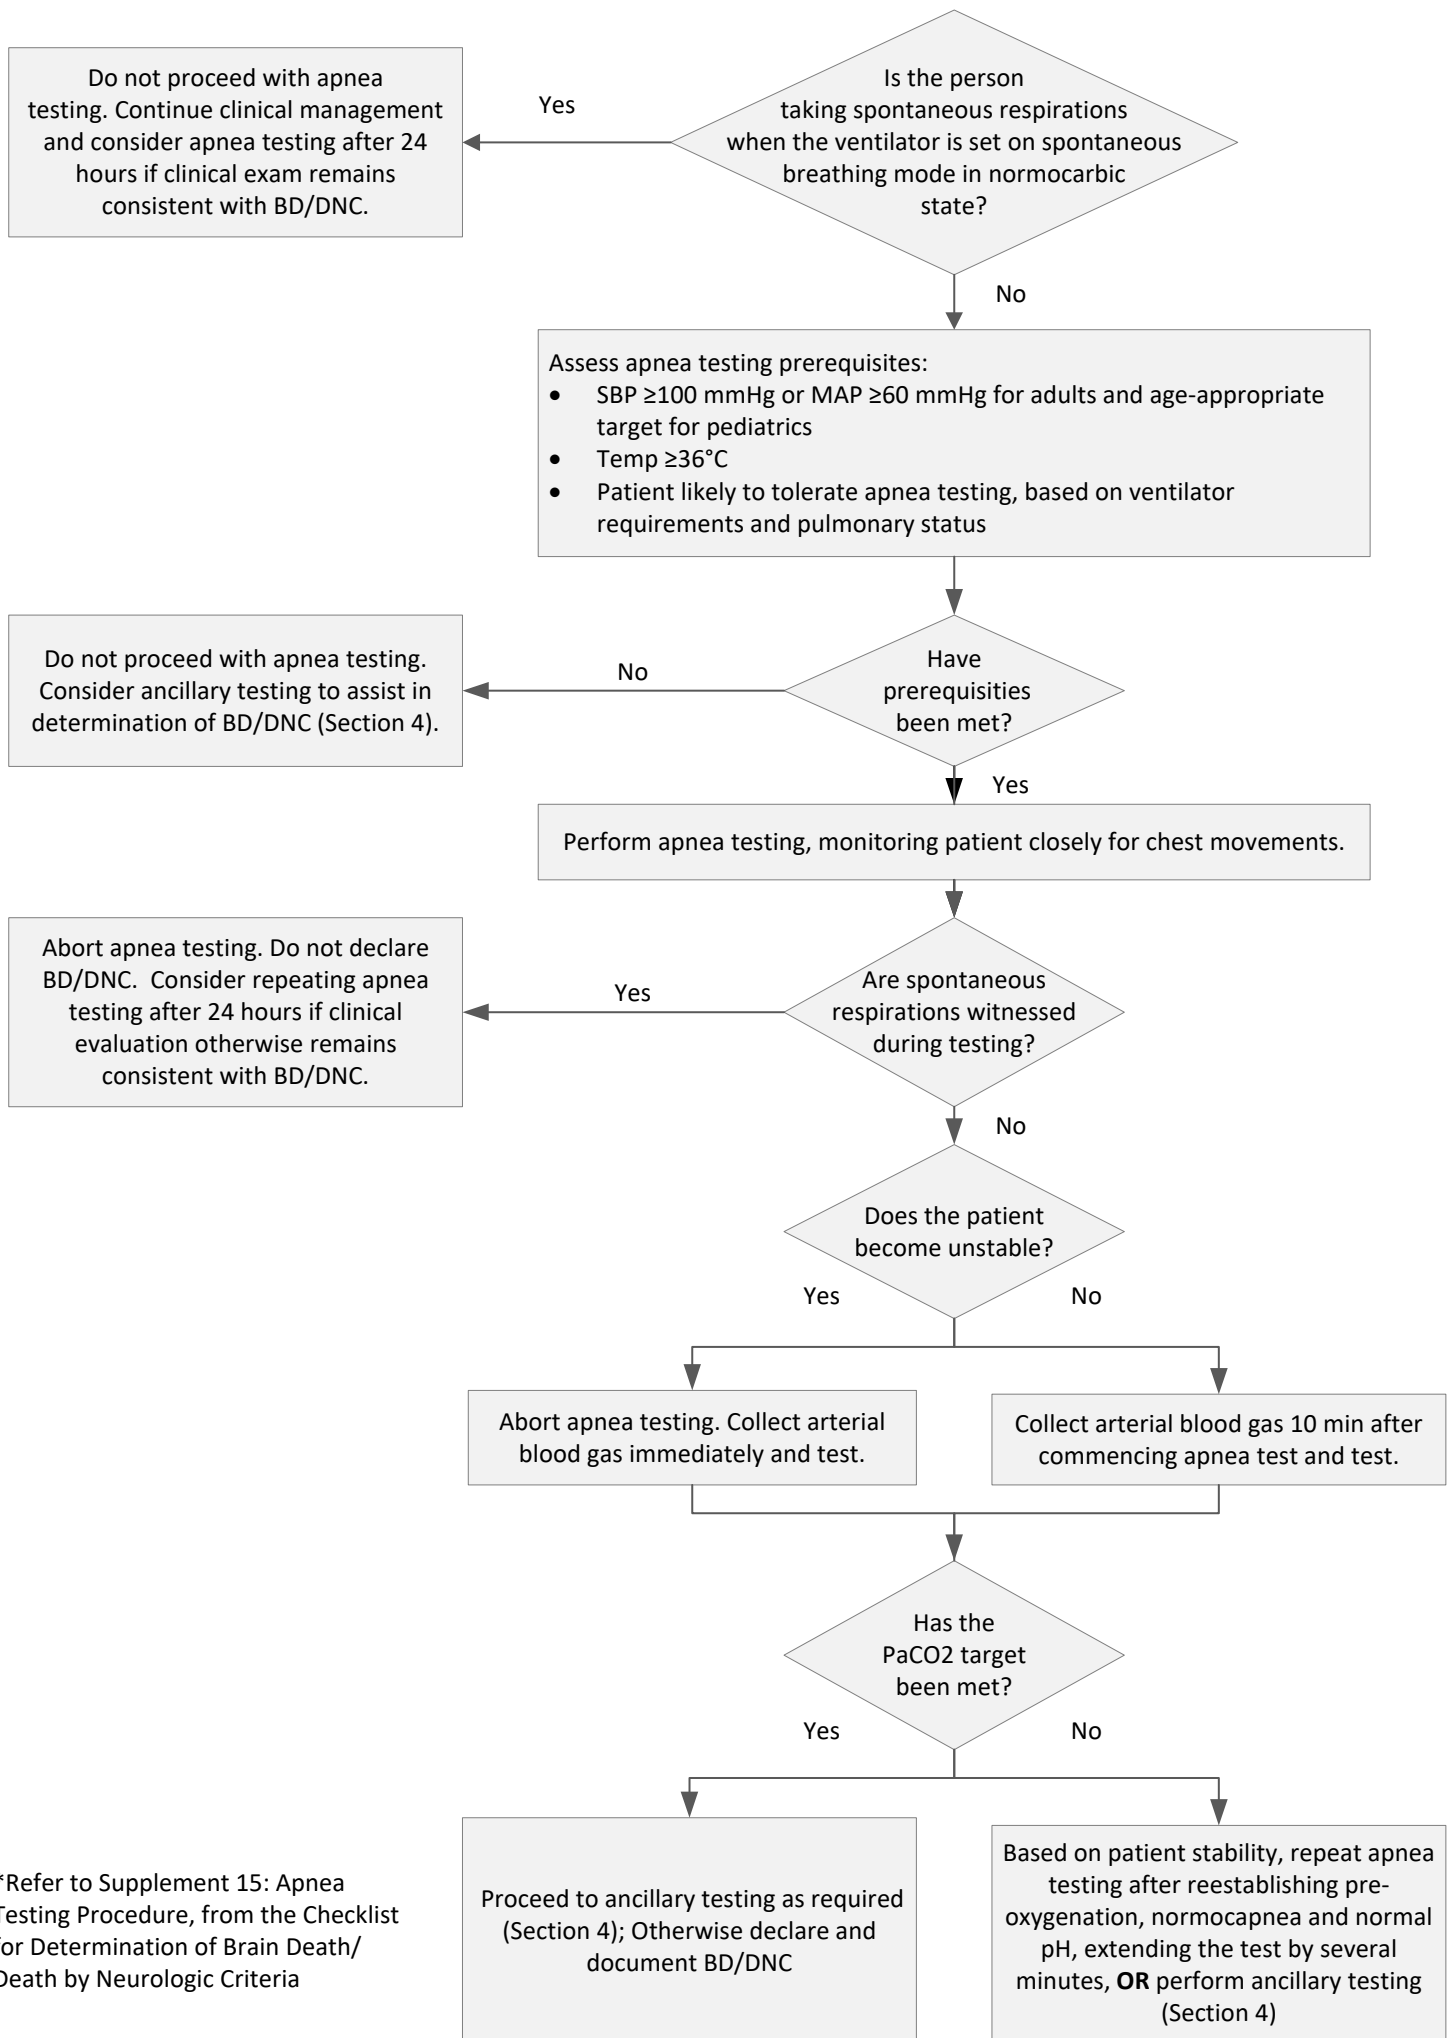

\*Refer to Supplement 15: Apnea Testing Procedure, from the Checklist for Determination of Brain Death/Death by Neurologic Criteria

## Section 4. Perform Ancillary Testing, as Required\*

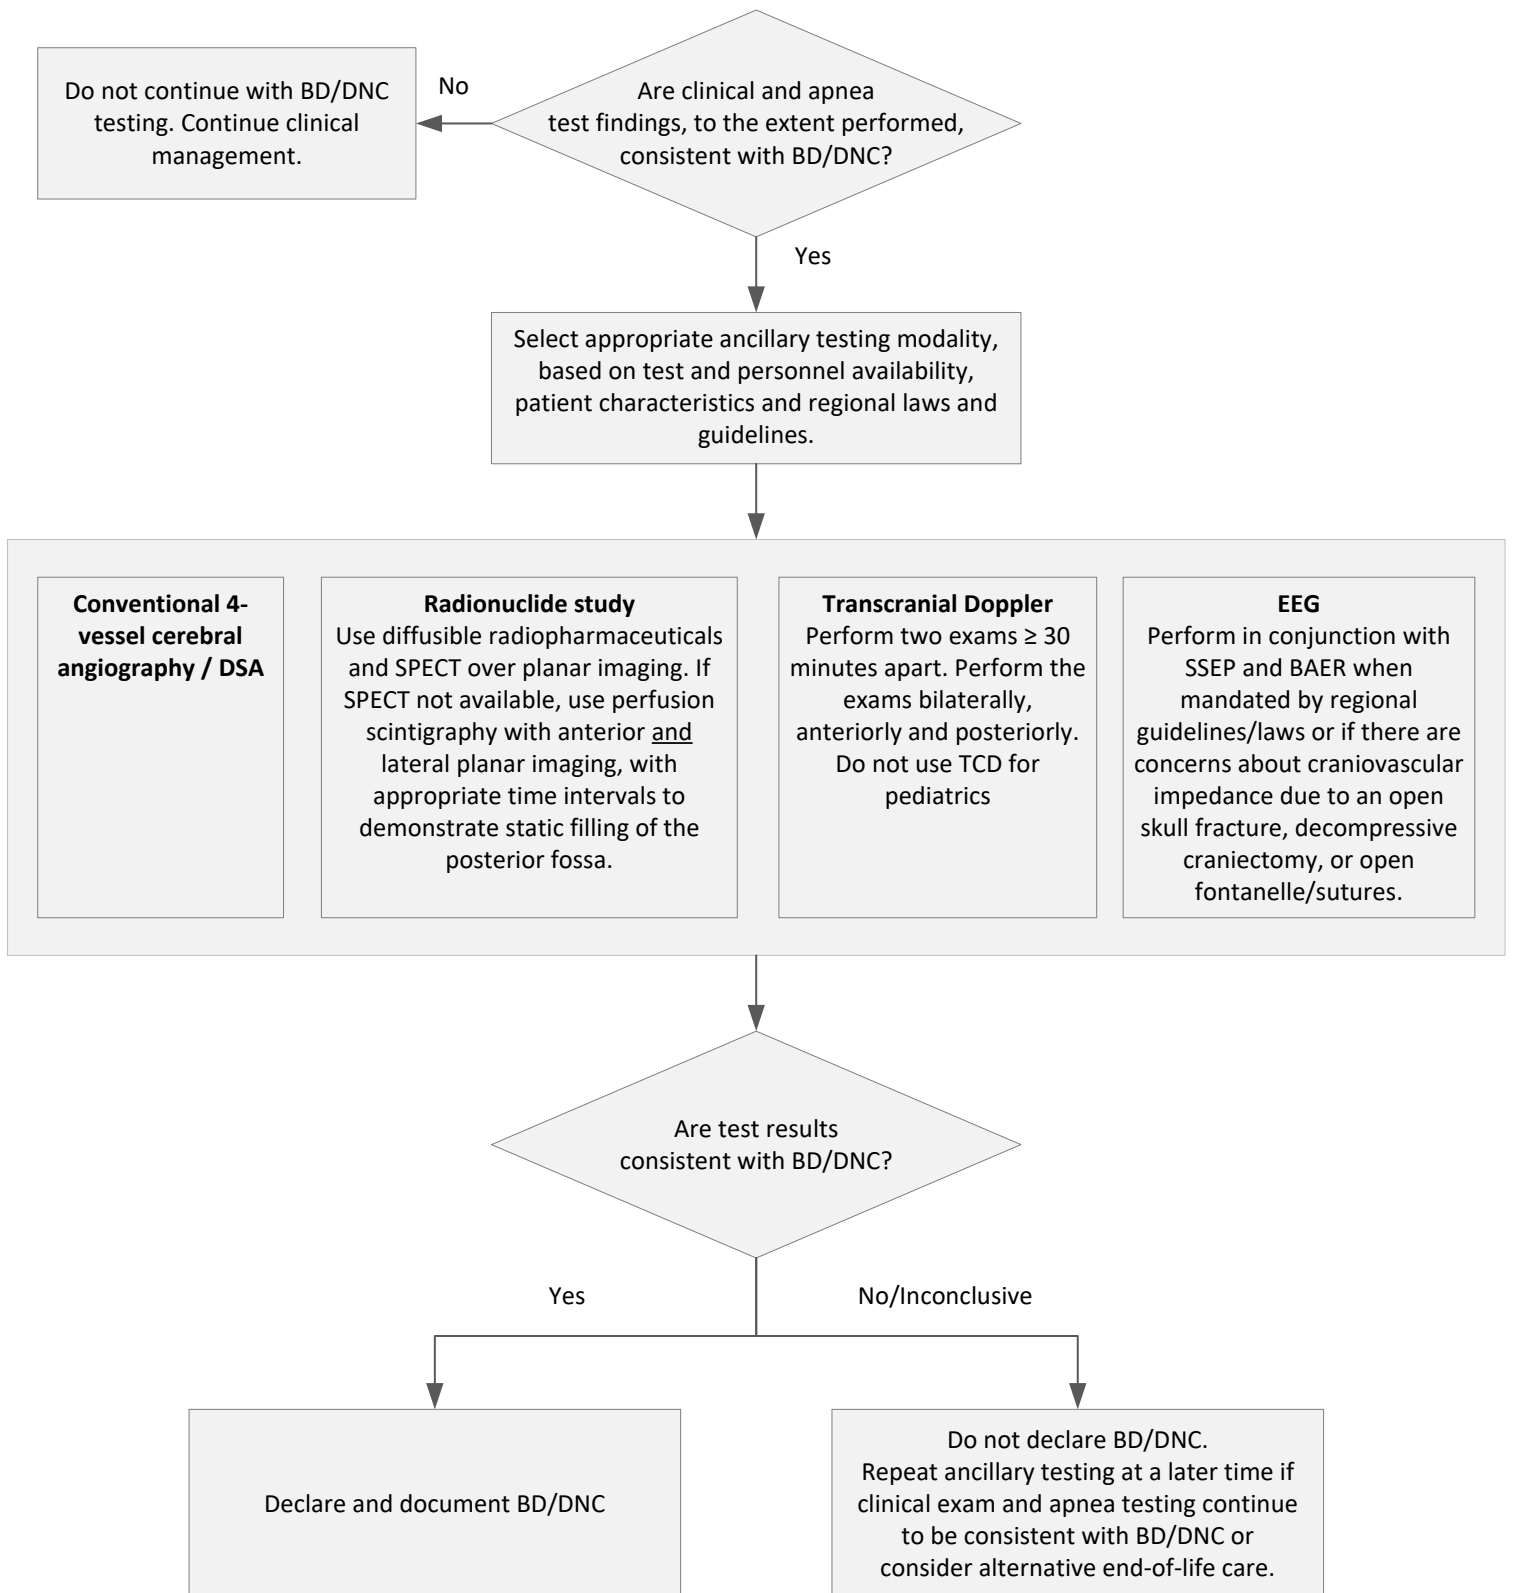

\*Refer to Supplement 15: Acceptable Ancillary Testing Modalities, from the Checklist for Determination of Brain Death/Death by Neurologic Criteria
